# Supplementary material for: Flexible and high-performance electrochromic devices enabled by self-assembled 2D TiO2/MXene heterostructures
Source: PubMed Central journal article supplement (PMC7952574; doi:10.1038/s41467-021-21852-7), 2021-03-11
Supplement: 41467_2021_21852_MOESM1_ESM.pdf [file 41467_2021_21852_MOESM1_ESM.pdf]

## Supplementary Materials

### Flexible and High-Performance Electrochromic Devices Enabled by Self-Assembled 2D TiO<sub>2</sub>/MXene Heterostructures

Ran Li<sup>1,2†</sup>, Xiaoyuan Ma<sup>2†</sup>, Jianmin Li<sup>1</sup>, Jun Cao<sup>2</sup>, Hongze Gao<sup>3</sup>, Tianshu Li<sup>3</sup>, Xiaoyu Zhang<sup>1</sup>, Lichao Wang<sup>1</sup>, Qinghong Zhang<sup>1</sup>, Gang Wang<sup>1</sup>, Chengyi Hou<sup>1</sup>, Yaogang Li<sup>1</sup>, Tomás Palacios<sup>4</sup>, Yuxuan Lin<sup>4\*#</sup>, Hongzhi Wang<sup>1\*</sup>, and Xi Ling<sup>2,3,5\*</sup>

<sup>1</sup>State Key Laboratory for Modification of Chemical Fibers and Polymer Materials, College of Materials Science and Engineering, Donghua University, Shanghai 201620, China.

<sup>2</sup>Department of Chemistry, Boston University, 590 Commonwealth Avenue, Boston, MA 02215, USA.

<sup>3</sup>Division of Materials Science and Engineering, Boston University, 15 St. Mary's street, Boston, MA 02215, USA.

<sup>4</sup>Department of Electrical Engineering and Computer Science, Massachusetts Institute of Technology, Cambridge, MA 02139, USA.

<sup>5</sup>The Photonics Center, Boston University, 8 St. Mary's street, Boston, MA 02215, USA.

†These authors contributed equally to this work.

\*Correspondence to: (X.L.) [xiling@bu.edu](mailto:xiling@bu.edu); (H.W.) [wanghz@dhu.edu.cn](mailto:wanghz@dhu.edu.cn); (Y.L.) [yxlin@berkeley.edu](mailto:yxlin@berkeley.edu)

#Current address: Department of Electrical Engineering and Computer Sciences, University of California, Berkeley, CA 94720, USA.

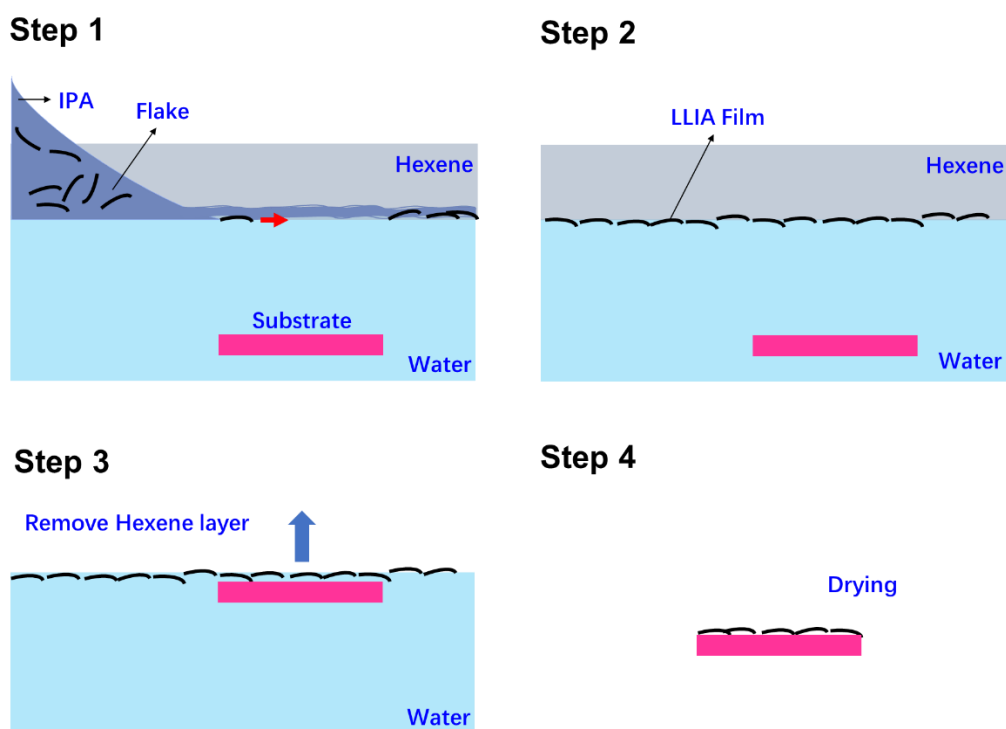

**Supplementary Figure 1.** Schematic illustration of the self-assembly process at the IPA/water interface and the transfer process.

Fig. S1 shows the LLIA assembly and film transfer processes: (1) Add 2D flakes/IPA dispersion into the hexane/water interface; (2) After the film formed at the interface, remove the hexane layer carefully; (3,4) Take substrate out from water and dry it in the oven (PET films are pasted on a glass substrate to keep it in shape when taking out from water). In this process, due to the density difference of the liquids, IPA solvent is quickly dropped to the bottom of the hexene layer and spread at the hexene/water interface at first. Then, flakes that are originally aggregated in the IPA phase spread out on the water surface. When the IPA mixture with hexene becomes thinner, the 2D flakes spread out quickly and settles at the edge of the container sidewall or an already assembled film. Continuous addition of the flakes eventually leads to the formation of a large-area monolayer of the material. The formation process of the films is recorded in the video S1 and video S2.

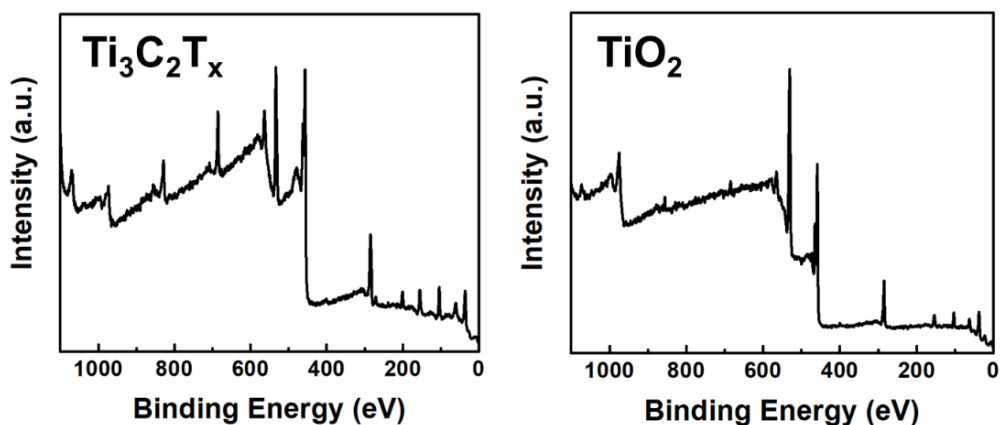

**Supplementary Figure 2.** XPS spectra of  $\text{Ti}_3\text{C}_2\text{T}_x$  and derived  $\text{TiO}_2$  annealed at  $400^\circ\text{C}$  for 50 h.

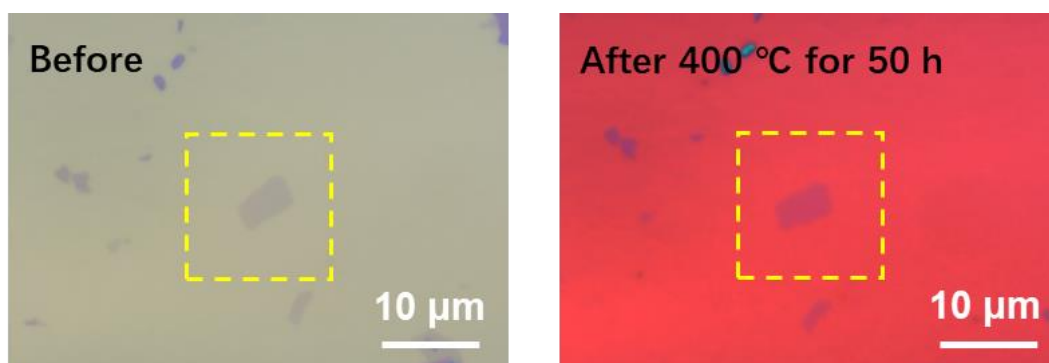

**Supplementary Figure 3.**  $\text{Ti}_3\text{C}_2\text{T}_x$  flake before and after annealing at  $400^\circ\text{C}$  for 50 h on a  $\text{SiO}_2/\text{Si}$  substrate (the change of the background color is due to the interference effect caused by the change of the  $\text{SiO}_2$  thickness after annealing).

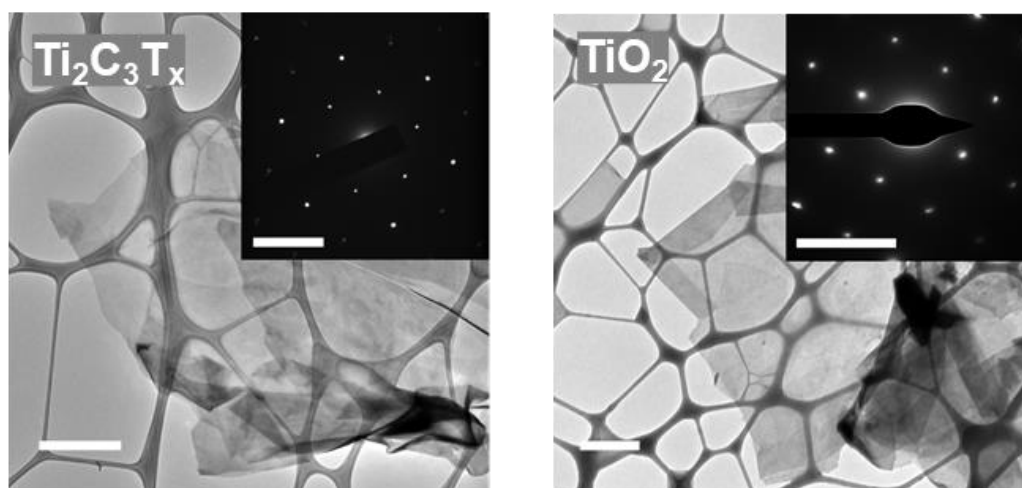

**Supplementary Figure 4.** TEM images of  $\text{Ti}_3\text{C}_2\text{T}_x$  and derived  $\text{TiO}_2$  flakes on a TEM grid (scale bar:  $1\ \mu\text{m}$ ); Insets: SEAD patterns of  $\text{Ti}_3\text{C}_2\text{T}_x$  and derived  $\text{TiO}_2$  flakes (scale bar:  $5\ \text{nm}^{-1}$ ).

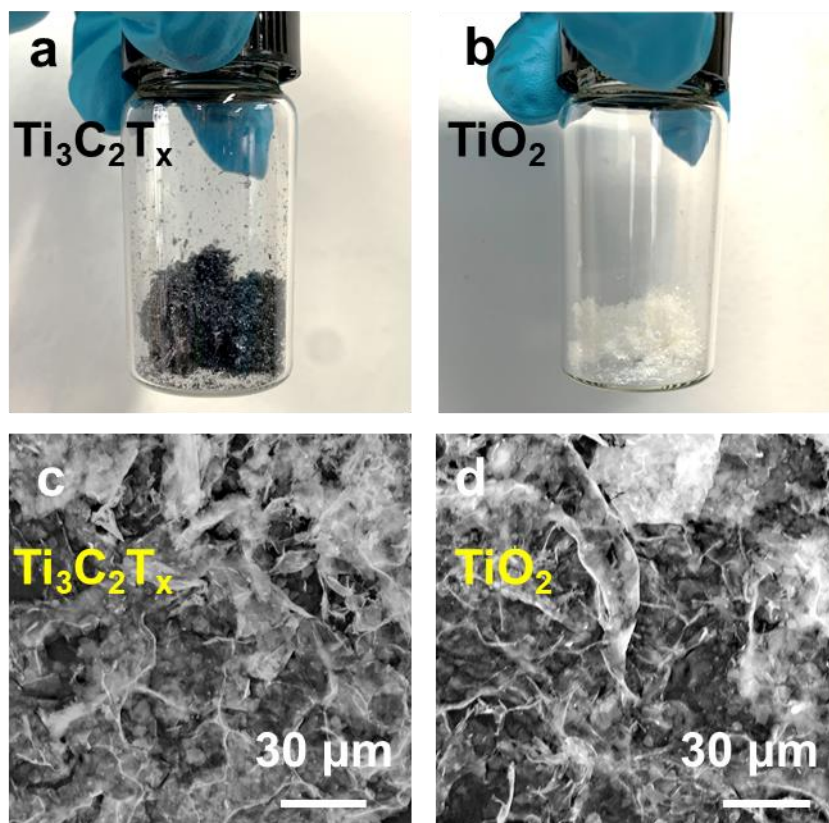

**Supplementary Figure 5.** Photographs of (a)  $\text{Ti}_3\text{C}_2\text{T}_x$  and (b)  $\text{TiO}_2$  aerogels; SEM images of (c)  $\text{Ti}_3\text{C}_2\text{T}_x$  and (d)  $\text{TiO}_2$  aerogels.

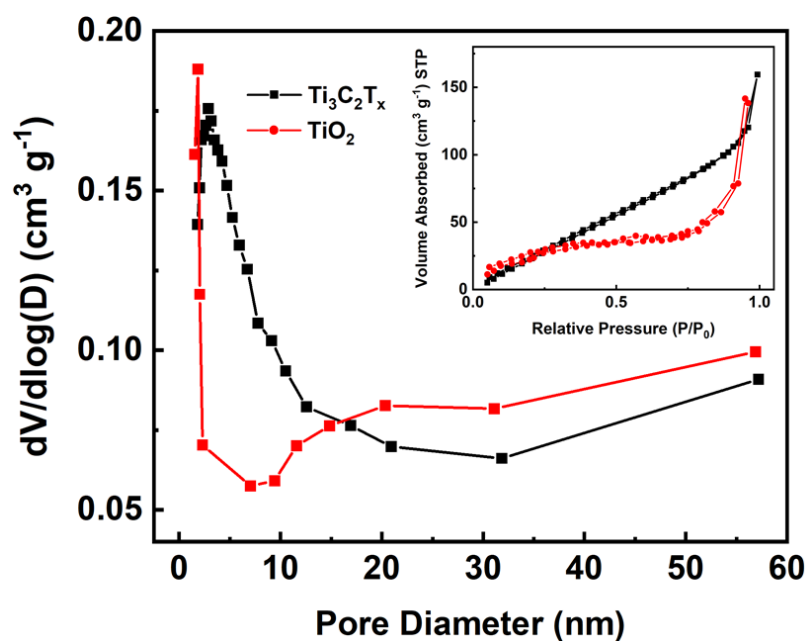

**Supplementary Figure 6.** Pore size distributions of  $\text{Ti}_3\text{C}_2\text{T}_x$  (black) and  $\text{TiO}_2$  (red) aerogels extracted using the Barrett-Joyner-Halenda method. Inset:  $\text{N}_2$  adsorption and desorption isotherm curves for  $\text{Ti}_3\text{C}_2\text{T}_x$  and  $\text{TiO}_2$  aerogels measured at 77 K.

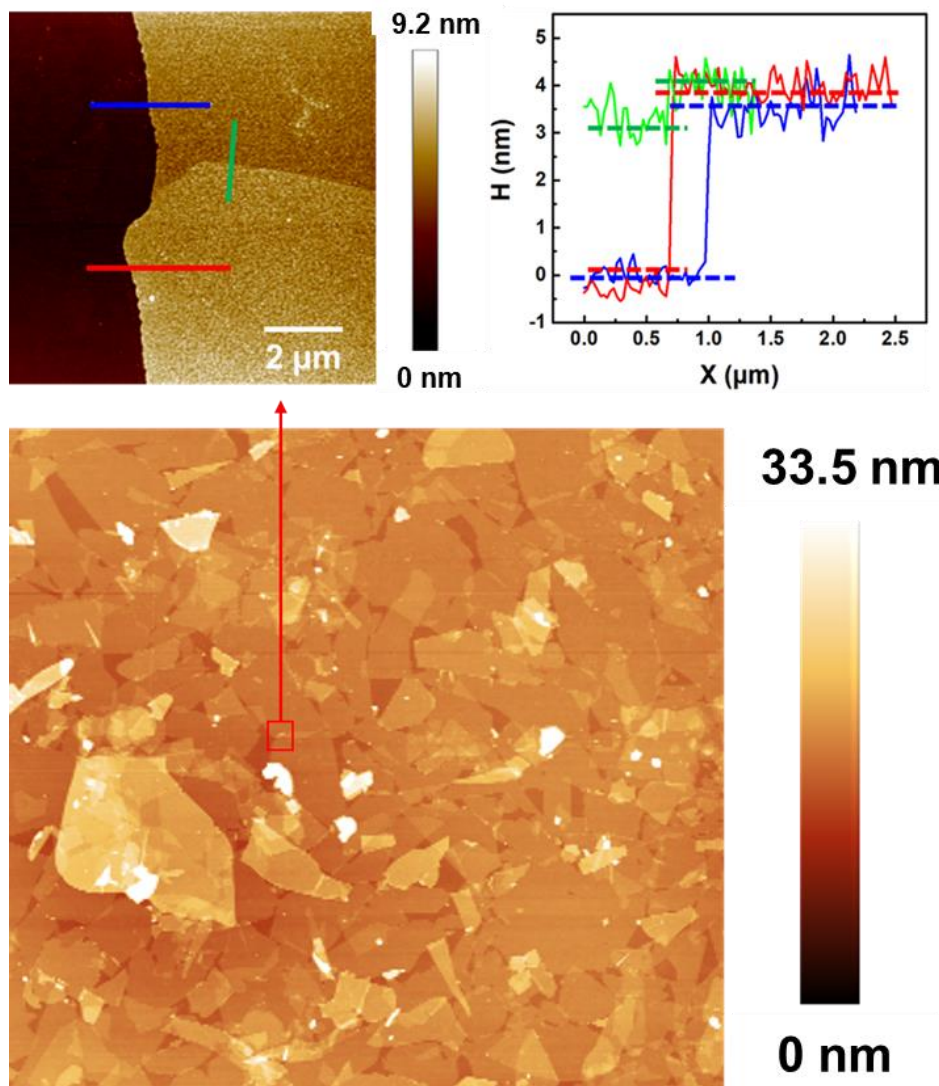

**Supplementary Figure 7.** AFM images and height profile of the LLIA  $\text{Ti}_3\text{C}_2\text{T}_x$  thin film.

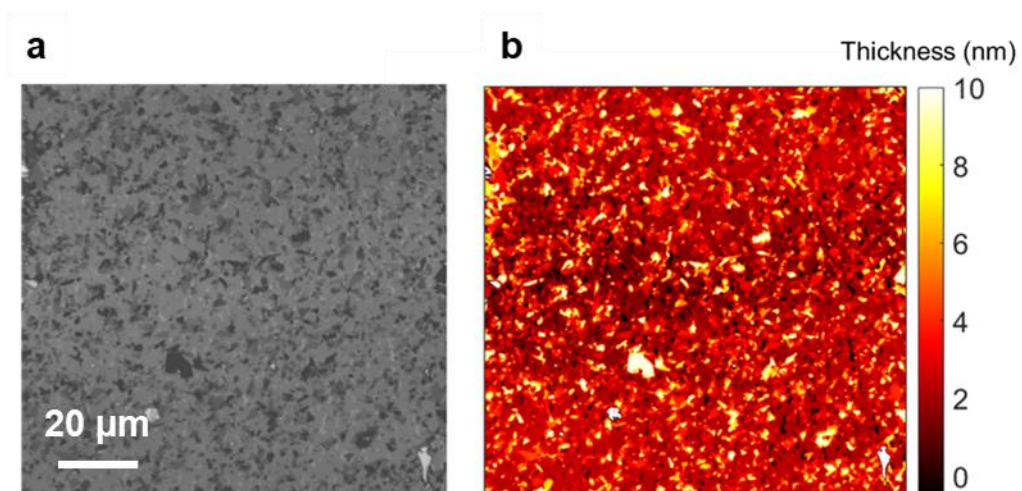

**Supplementary Figure 8.** (a) Optical microscope image (in gray scale) of the LLIA  $\text{Ti}_3\text{C}_2\text{T}_x$  thin film; (b) height mapping obtained by calibrating (a) by the selective-area AFM image.

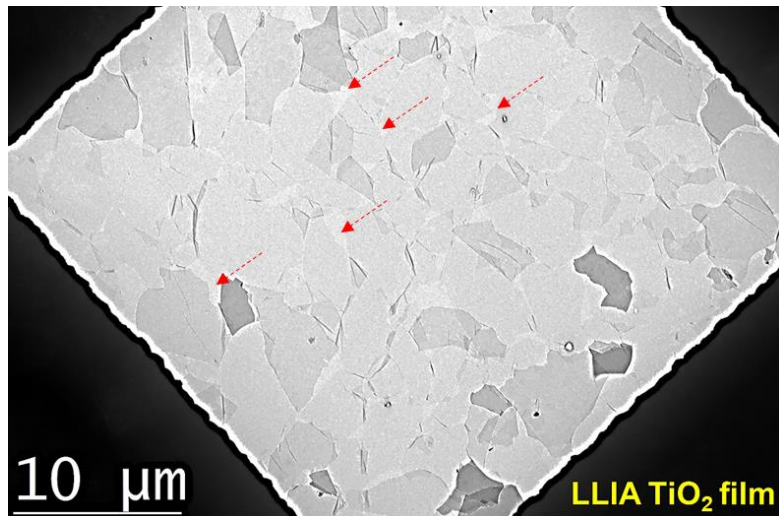

**Supplementary Figure 9.** TEM image of LLIA TiO<sub>2</sub> film on a TEM grid (typical pores are pointed by arrows).

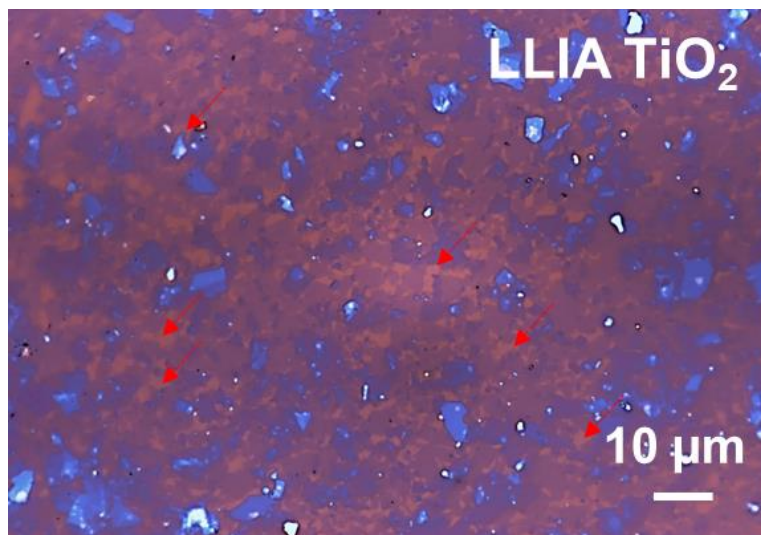

**Supplementary Figure 10.** OM image of LLIA TiO<sub>2</sub> film on a SiO<sub>2</sub>/Si wafer (typical pores are pointed by arrows).

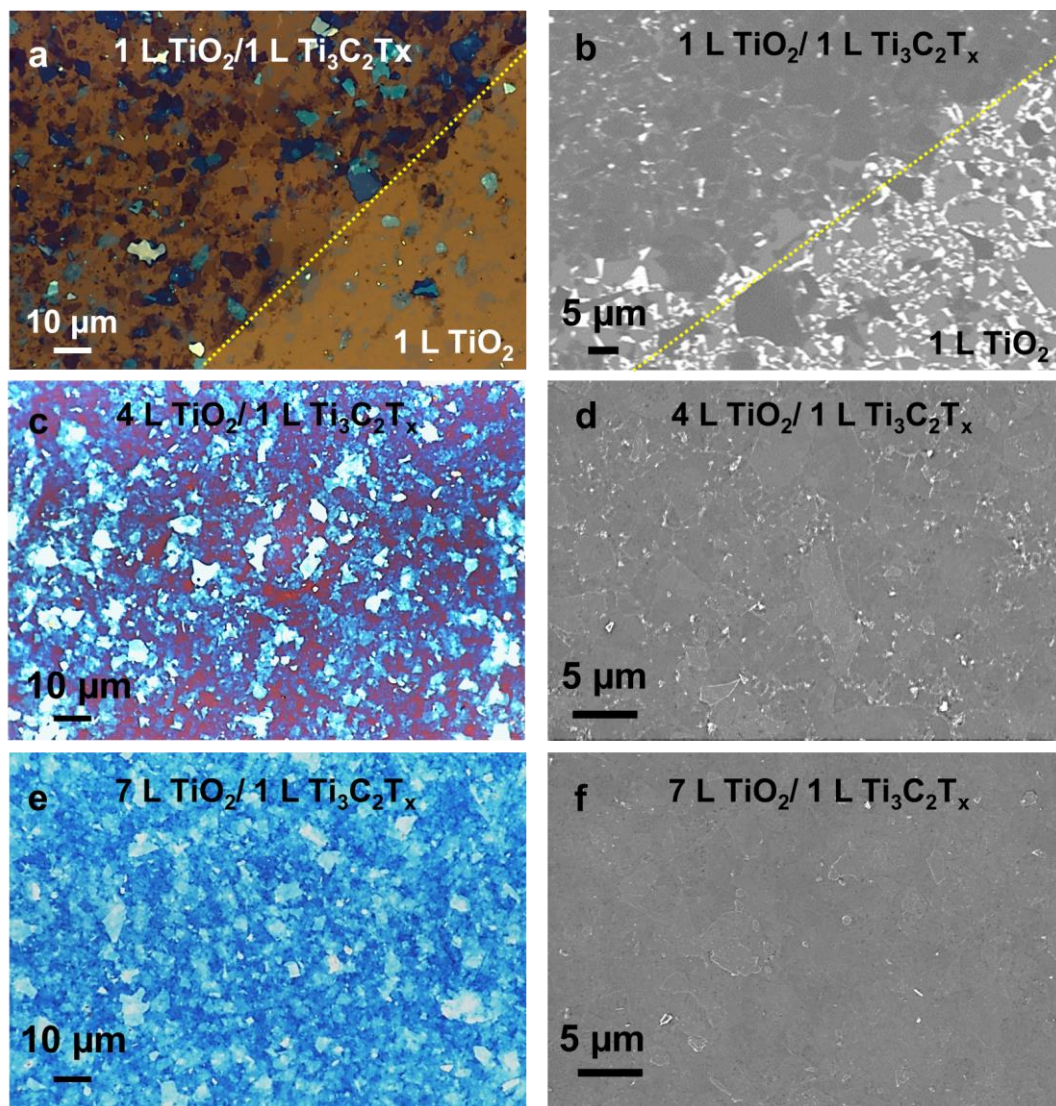

**Supplementary Figure 11.** OM images of assembled heterostructures with (a) 1-layer, (c) 4-layers and (e) 7-layers of TiO<sub>2</sub> on a 1-layer of Ti<sub>3</sub>C<sub>2</sub>T<sub>x</sub> on a SiO<sub>2</sub>/Si substrate; SEM images (b, d and f) of the corresponding structures in (a-f).

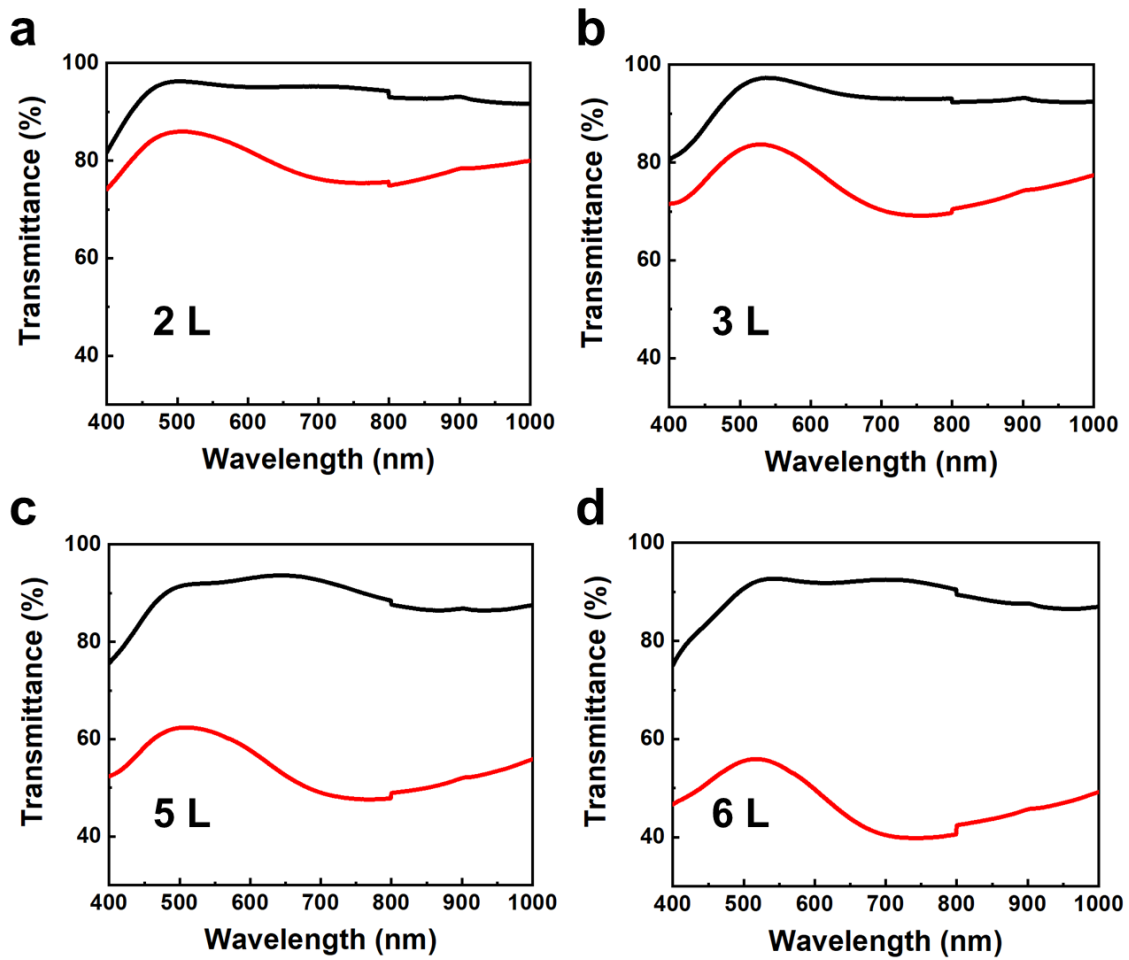

**Supplementary Figure 12.** Optical transmittance spectra of  $\text{TiO}_2/\text{Ti}_3\text{C}_2\text{T}_x/\text{PET}$  films with 2, 3, 5 and 6 layers of  $\text{TiO}_2$  at the biases of 0 V (black) and -1.8 V (red).



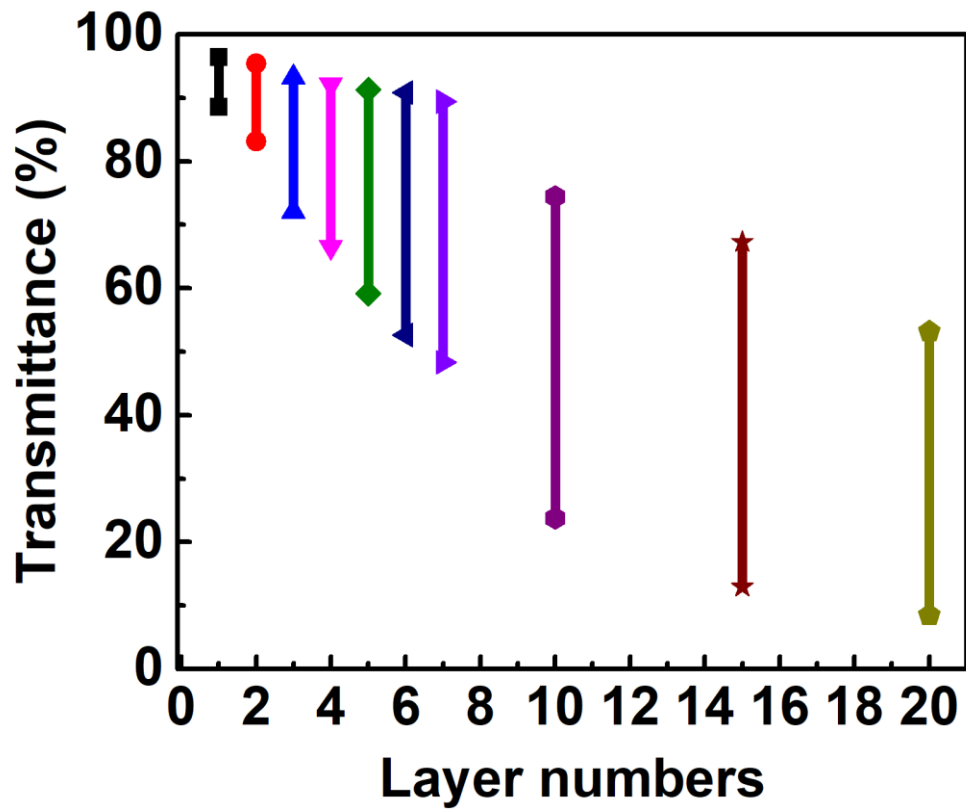

**Supplementary Figure 13.** Optical window of the heterostructures with different layers of LLIA TiO<sub>2</sub> films at the transmittance at 550 nm.

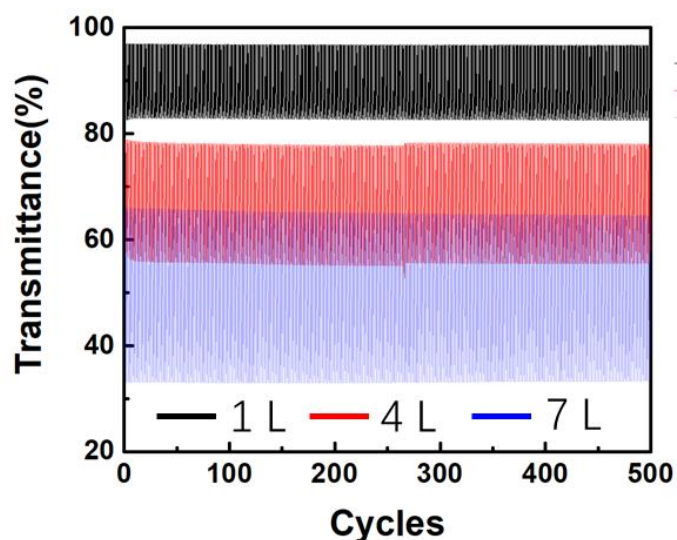

**Supplementary Figure 14.** Cycling stability of  $\text{TiO}_2/\text{Ti}_3\text{C}_2\text{T}_x/\text{PET}$  films with 1, 4, and 7 layers of  $\text{TiO}_2$  with the transmittance measured at 550 nm and the voltage changed periodically between 0 V and -1.6 V.

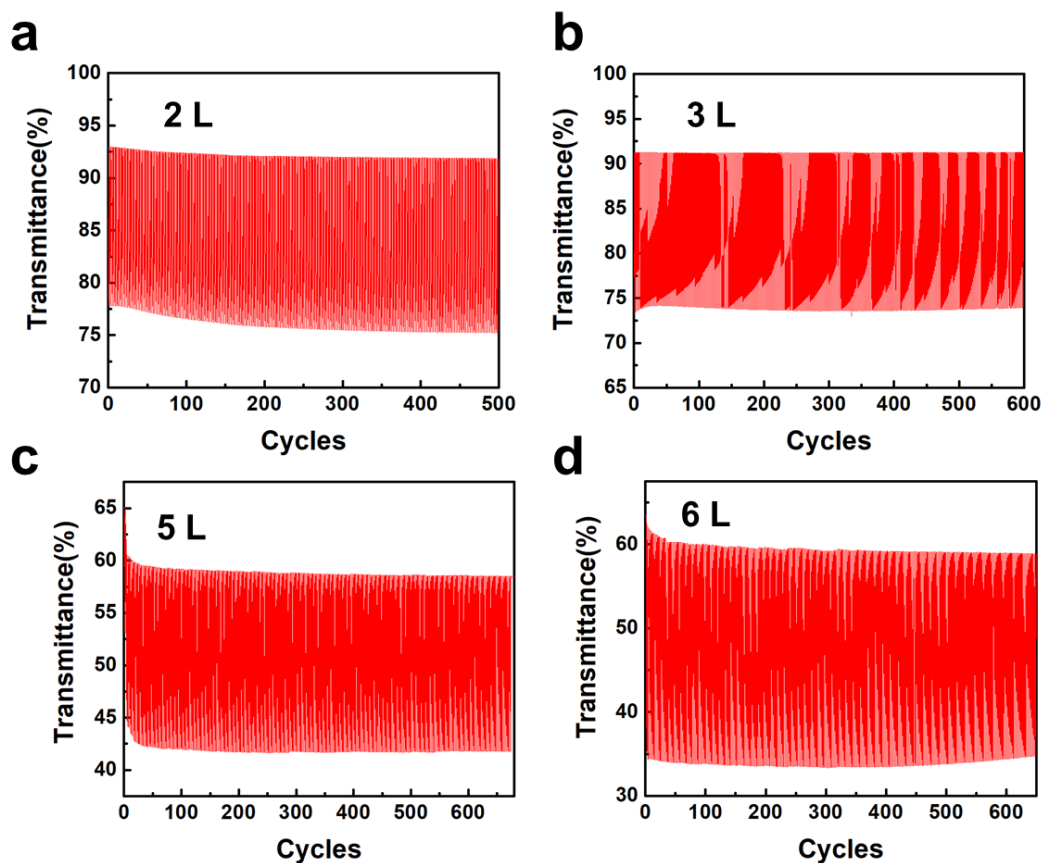

**Supplementary Figure 15.** Cycling stability of  $\text{TiO}_2/\text{Ti}_3\text{C}_2\text{T}_x/\text{PET}$  films with 2, 3, 5, and 6 layers of  $\text{TiO}_2$  with the transmittance measured at 550 nm and the voltage changed periodically between 0 V and -1.6 V.

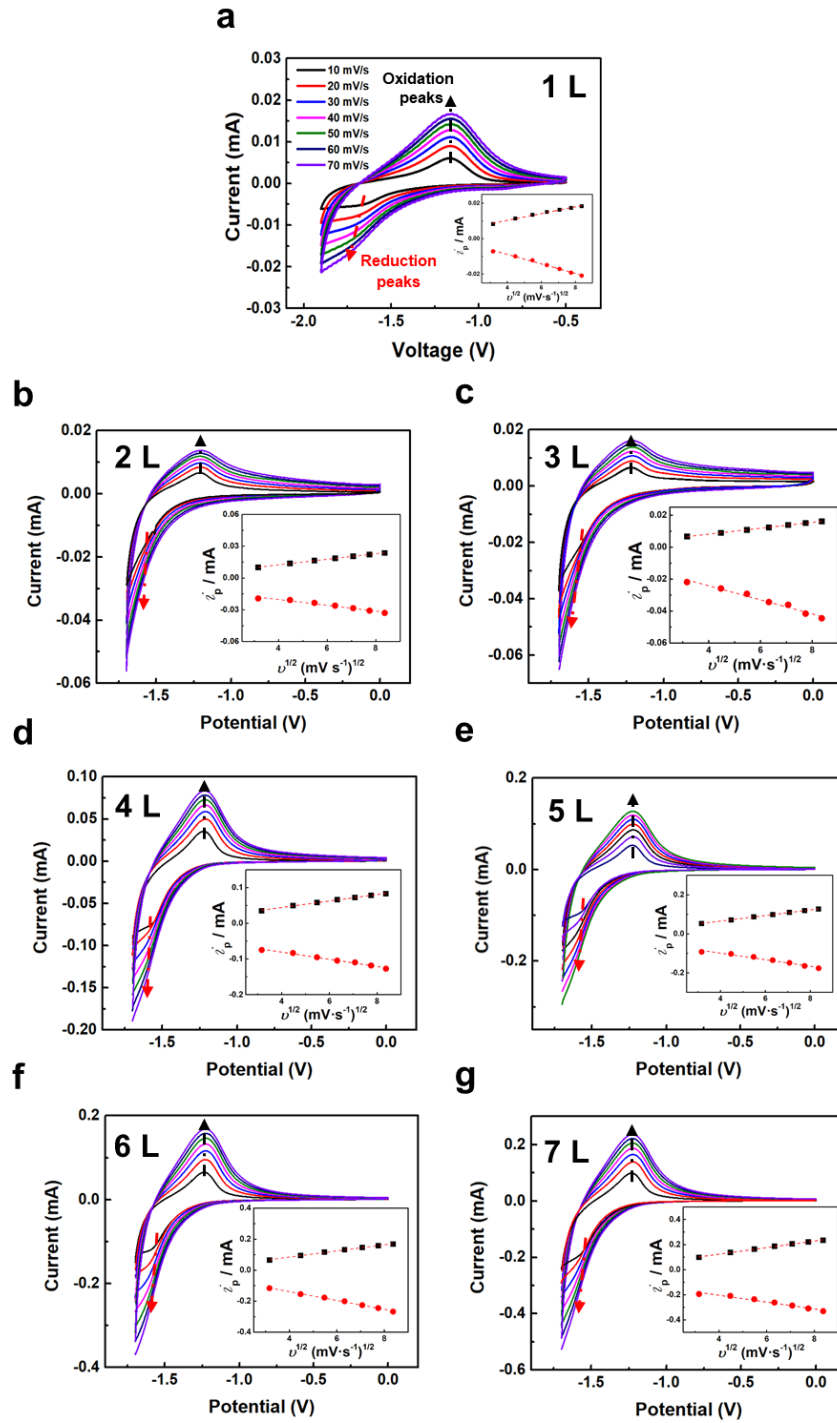

**Supplementary Figure 16.** Cyclic voltammetry curves of TiO<sub>2</sub>/Ti<sub>3</sub>C<sub>2</sub>T<sub>x</sub>/PET films. Insets: peak anodic (black) and cathodic (red) currents ( $i_p$ ) as functions of square roots of scan rates ( $v^{1/2}$ ).

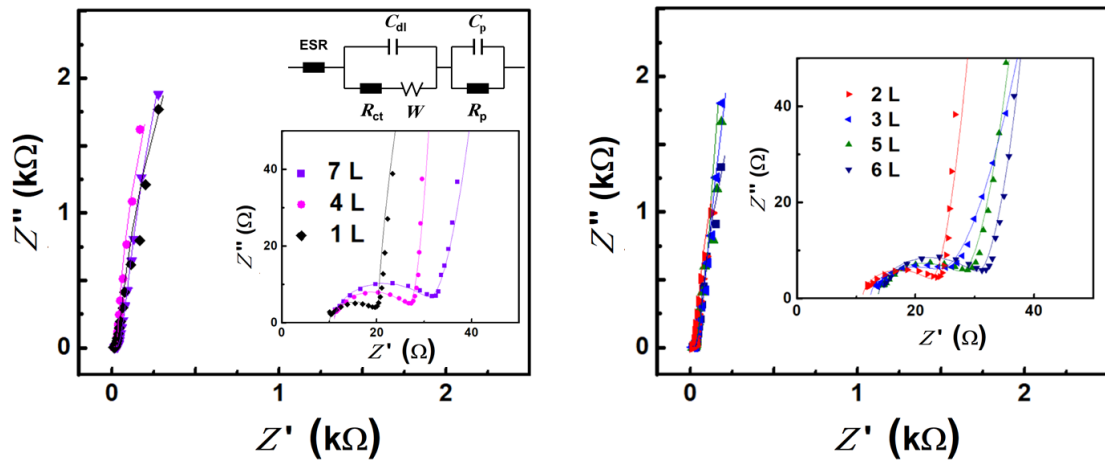

**Supplementary Figure 17.** Nyquist plots and corresponding simulation results (fitting lines) of  $\text{TiO}_2/\text{Ti}_3\text{C}_2\text{T}_x/\text{PET}$  films. Insets: equivalent circuit and zoomed-in Nyquist plots.

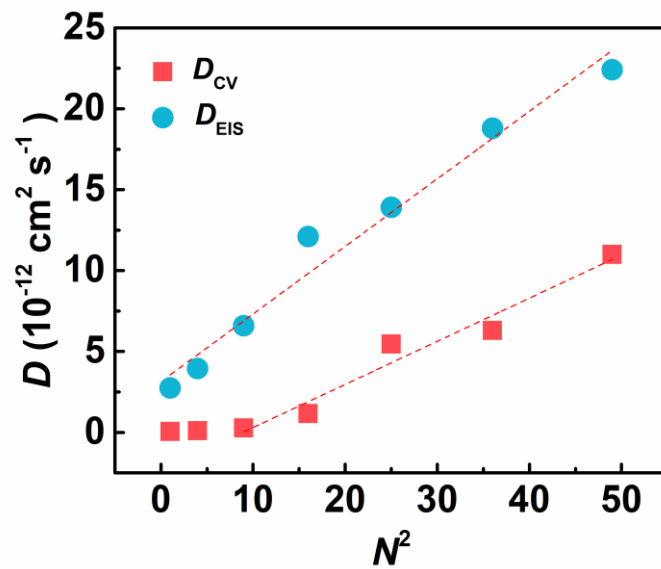

**Supplementary Figure 18.** Apparent ion diffusion coefficient ( $D$ ) as a function of the square of the number of layers ( $N^2$ ).

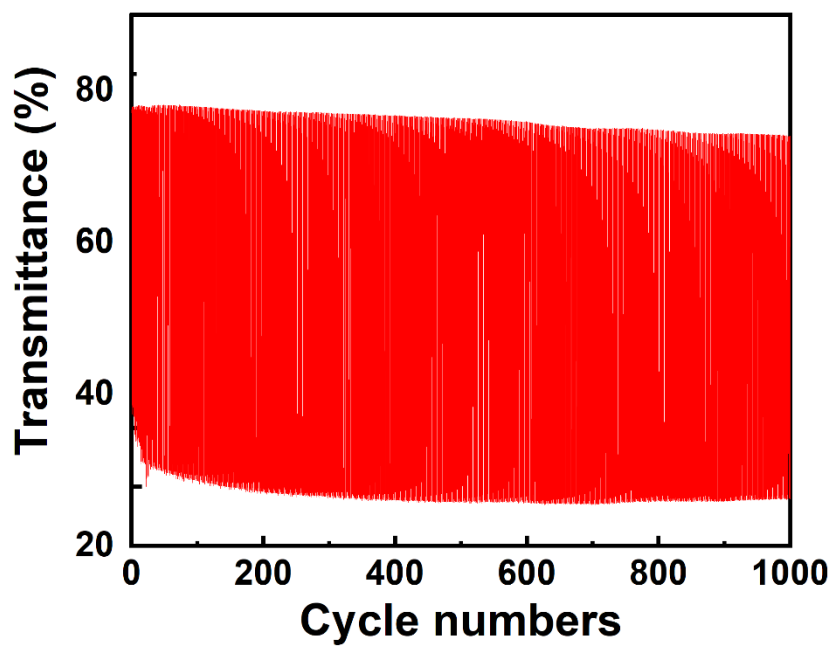

**Supplementary Figure 19.** Cycling stability of the flexible electrochromic device with the transmittance measured at 550 nm and the voltage changed periodically between -3 V and 1V.

**Supplementary Table 1.** Comparison of the sheet resistance and transmittance of transparent electrodes made with MXene, graphene, and reduced graphene oxides.

| Sample/Preparing method                                           | Sheet resistance ( $\Omega \text{ sq}^{-1}$ ) | Transmittance (%) | Reference |
|-------------------------------------------------------------------|-----------------------------------------------|-------------------|-----------|
|                                                                   | 6                                             | 12                |           |
|                                                                   | 11                                            | 28                |           |
|                                                                   | 25                                            | 44                |           |
|                                                                   | 42                                            | 54                |           |
|                                                                   | 51                                            | 52                |           |
| Ti <sub>3</sub> C <sub>2</sub> T <sub>x</sub> /Spin coating       | 74                                            | 62                | (1)       |
|                                                                   | 106                                           | 75                |           |
|                                                                   | 109                                           | 69                |           |
|                                                                   | 200                                           | 86                |           |
|                                                                   | 370                                           | 91                |           |
|                                                                   | 1031                                          | 94                |           |
|                                                                   | 1975                                          | 98                |           |
|                                                                   | 128                                           | 65                |           |
| Ti <sub>2</sub> CT <sub>x</sub> /Spin coating                     | 507                                           | 80                | (2)       |
|                                                                   | 1100                                          | 86                |           |
|                                                                   | 6440                                          | 96                |           |
| Ti <sub>3</sub> C <sub>2</sub> T <sub>x</sub> -Carbon nanotube/LB | 2960                                          | 88                | (3)       |
|                                                                   | 817                                           | 65                |           |
| Ti <sub>3</sub> C <sub>2</sub> T <sub>x</sub> /Dip coating        | 40                                            | 51                | (4)       |
|                                                                   | 4300                                          | 94                |           |
| Ti <sub>3</sub> C <sub>2</sub> T <sub>x</sub> /Self-assembly      | 3716.7                                        | 82                | (5)       |
|                                                                   | 280.83                                        | 79                |           |
|                                                                   | 641.84                                        | 51                |           |
| Ti <sub>3</sub> C <sub>2</sub> T <sub>x</sub> /Spray coating      | 858.33                                        | 56                | (6)       |
|                                                                   | 1273.7                                        | 68                |           |
|                                                                   | 7974                                          | 82                |           |
|                                                                   | 49167                                         | 91                |           |
|                                                                   | 470.92                                        | 77                |           |
|                                                                   | 642.37                                        | 77                |           |
| Ti <sub>3</sub> C <sub>2</sub> T <sub>x</sub> /Spin coating       | 682.1                                         | 79                | (7)       |
|                                                                   | 611.32                                        | 79                |           |
|                                                                   | 649.42                                        | 81                |           |
|                                                                   | 871.75                                        | 81                |           |
|                                                                   | 856.04                                        | 83                |           |
| Reduced graphene oxide                                            | 330                                           | 60                | (8)       |
| Graphene                                                          | 10492                                         | 80                | (9)       |
|                                                                   | 1623                                          | 97                |           |
|                                                                   | 210                                           | 94                |           |
|                                                                   | 140                                           | 91                |           |
| Ti <sub>3</sub> C <sub>2</sub> T <sub>x</sub> /LLIA               | 123                                           | 88                | This work |
|                                                                   | 116                                           | 82                |           |
|                                                                   | 103                                           | 80                |           |
|                                                                   | 66                                            | 64                |           |

**Supplementary Table 2.** Summary of EC properties of TiO<sub>2</sub>/Ti<sub>3</sub>C<sub>2</sub>T<sub>x</sub>/PET films with 1 to 7 layers of TiO<sub>2</sub>.

| <b>Layers</b> | <b><math>T_b</math> at 550 nm (%)</b> | <b><math>T_c</math> at 550 nm (%)</b> | <b><math>\Delta T</math> (%)</b> | <b>Coloring/bleaching time (s)</b> | <b>CE (cm<sup>2</sup> C<sup>-1</sup>)</b> |
|---------------|---------------------------------------|---------------------------------------|----------------------------------|------------------------------------|-------------------------------------------|
| 1             | 96.45                                 | 88.56                                 | 7.89                             | 0.71/0.12                          | 277                                       |
| 2             | 95.43                                 | 83.17                                 | 12.26                            | 0.73/0.12                          | 271                                       |
| 3             | 93.23                                 | 72.11                                 | 21.12                            | 1.03/0.20                          | 260                                       |
| 4             | 92.12                                 | 66.52                                 | 25.60                            | 1.08/0.24                          | 263                                       |
| 5             | 91.28                                 | 59.16                                 | 32.12                            | 1.08/0.26                          | 259                                       |
| 6             | 90.83                                 | 52.63                                 | 38.20                            | 1.23/0.29                          | 245                                       |
| 7             | 89.42                                 | 48.33                                 | 41.09                            | 1.63/0.38                          | 243                                       |

**Supplementary Table 3.** Comparison of EC properties for TiO<sub>2</sub> and other inorganic/organic materials.

| Material                  | Base <sup>a</sup>             | Structure    | Thickness (nm) | T <sub>b</sub> /T <sub>c</sub> (%/%) | Δα (10 <sup>-4</sup> nm <sup>-1</sup> ) | Coloring/bleaching time (s) | Wavelength (nm) | CE (cm <sup>2</sup> C <sup>-1</sup> ) | Cyclability (%/cycles) |
|---------------------------|-------------------------------|--------------|----------------|--------------------------------------|-----------------------------------------|-----------------------------|-----------------|---------------------------------------|------------------------|
| TiO <sub>2</sub>          | Glass <sup>(10)</sup>         | Nanowire     | 600            | 75/47                                | 7.8                                     | 11.3/14.3                   | 600             | 14                                    | >20                    |
|                           | Glass <sup>(11)</sup>         | Dense film   | 230            | 65/10                                | 81.4                                    | >300                        | 510             | 56                                    | NA                     |
|                           | Glass <sup>(12)</sup>         | Nanoparticle | 1100           | 2                                    | 6.3                                     | 69/7                        | 550             | 18                                    | 90/2000                |
|                           | Glass <sup>(13)</sup>         | Nanorod      | 600            | 80/40                                | 11.6                                    | 27/2                        | 800             | 11                                    | 92/200                 |
|                           | Glass <sup>(14)</sup>         | Nanoneedle   | 650            | 78/11                                | 30.1                                    | 11.3/5.1                    | 600             | 226                                   | 89/250                 |
|                           | Glass <sup>(15)</sup>         | Nanorod      | 1000           | 70/42                                | 5.1                                     | 27/5                        | 800             | 16                                    | >90/200                |
|                           | <b>PET/<br/>This<br/>work</b> | 2D Flake     | <50 (7 L)      | 89/48                                | 123.4                                   | 1.6/0.4                     | 550             | 243                                   | >95/500                |
| Ta-Doped TiO <sub>2</sub> | Glass <sup>(16)</sup>         | Nanoparticle | 1200           | 87/1                                 | 37.2                                    | 66.8/6.9                    | 550             | 33.2                                  | 86.3/2000              |
| Viologen/TiO <sub>2</sub> | PET <sup>(17)</sup>           | NA           | 2300           | 75/10                                | 8.7                                     | 8/6                         | 600             | 226                                   | 87/1000                |
| MOF                       | Glass <sup>(18)</sup>         | Nanorod      | 1000           | 81/18                                | 15.0                                    | 2.1/1.9                     | 720             | 260                                   | 91/500                 |
| WO <sub>3</sub>           | Glass <sup>(19)</sup>         | Nanosheet    | 650            | 74/13                                | 26.8                                    | 10.7/7.0                    | 650             | NA                                    | 94/1000                |
|                           | PET <sup>(20)</sup>           | Nanowire     | NA             | 70/2                                 | NA                                      | 12.3/9                      | 632             | 34.5                                  | >1000                  |
| Polyimide                 | Glass <sup>(21)</sup>         | Dense film   | 730            | 98/1                                 | 62.8                                    | 20/20                       | 796             | 99                                    | 40/5000                |
| Viologen                  | PET <sup>(22)</sup>           | Dense film   | NA             | 98/70                                | NA                                      | 26/39                       | 550             | 65                                    | 53/75                  |
|                           | PET <sup>(23)</sup>           | NA           | NA             | 24                                   | NA                                      | 1.5/0.9                     | 550             | 375                                   | 95/4000                |
| PEDOT                     | PET <sup>(24)</sup>           | Dense film   | 407            | 63/4                                 | 29                                      | 8/10                        | 620             | 530                                   | 91/10000               |
|                           | PET <sup>(25)</sup>           | Dense film   | NA             | 38/9                                 | NA                                      | 0.3/2.5                     | 550             | 391                                   | NA                     |
| PANI                      | Glass <sup>(26)</sup>         | Dense film   | 60             | 59/75                                | 17                                      | 1.4/1.4                     | 700             | 46                                    | 90/300                 |
|                           | Glass <sup>(27)</sup>         | Nanowire     | NA             | 19/82                                | NA                                      | 1.0/ 1.5                    | 550             | 206                                   | 500                    |
| Poly-Pyrrole              | Glass <sup>(28)</sup>         | Dense film   | NA             | 84/23                                | NA                                      | ~2                          | 565             | 697                                   | NA                     |

*a*: reference.



**Supplementary Table 4.** Fitted parameters according to electrochemical impedance spectroscopy of TiO<sub>2</sub>/Ti<sub>3</sub>C<sub>2</sub>T<sub>x</sub>/PET films with 1 to 7 layers of TiO<sub>2</sub>.

| Layers | <i>ESR</i><br>( $\Omega$ ) | <i>R</i> <sub>ct</sub><br>( $\Omega$ ) | <i>CPE</i> <sub>dl</sub><br>( $\mu$ F) | <i>CPE</i> <sub>p</sub><br>( $\mu$ F) | <i>R</i> <sub>p</sub><br>(k $\Omega$ ) |
|--------|----------------------------|----------------------------------------|----------------------------------------|---------------------------------------|----------------------------------------|
| 1      | 10.1                       | 8.7                                    | 1.8                                    | 17.6                                  | 19.6                                   |
| 2      | 10.9                       | 8.9                                    | 2.2                                    | 19.1                                  | 19.2                                   |
| 3      | 14.1                       | 10.8                                   | 2.5                                    | 17.4                                  | 16.9                                   |
| 4      | 13.9                       | 12.5                                   | 2.2                                    | 17.6                                  | 21.3                                   |
| 5      | 9.8                        | 14.9                                   | 2.8                                    | 17.4                                  | 16.8                                   |
| 6      | 9.8                        | 15.0                                   | 2.9                                    | 18.2                                  | 16.5                                   |
| 7      | 11.6                       | 15.7                                   | 3.1                                    | 18.6                                  | 16.9                                   |

### Supplementary References

1. C. Zhang, B. Anasori, A. Seral-Ascaso, S. H. Park, N. McEvoy, A. Shmeliov, G. S. Duesberg, J. N. Coleman, Y. Gogotsi, V. Nicolosi, Transparent, Flexible, and Conductive 2D Titanium Carbide (MXene) Films with High Volumetric Capacitance. *Adv. Mater.* **29**, 1702678 (2017).
2. G. Ying, A. D. Dillon, A. T. Fafarman, M. W. Barsoum, Transparent, Conductive Solution Processed Spincoated 2D Ti<sub>2</sub>CT<sub>x</sub> (MXene) Films. *Mater. Res. Lett.* **5**, 391–398 (2017).
3. G.M. Weng, J. Li, M. Alhabeb, C. Karpovich, H. Wang, J. Lipton, K. Maleski, J. Kong, E. Shaulsky, M. Elimelech, Y. Gogotsi, A. D. Taylor, Layer-by-Layer Assembly of Cross-Functional Semi-transparent MXene-Carbon Nanotubes Composite Films for Next-Generation Electromagnetic Interference Shielding. *Adv. Funct. Mater.* **28**, 1803360 (2018).
4. P. Salles, E. Quain, N. Kurra, A. Sarycheva, Y. Gogotsi, Automated Scalpel Patterning of Solution Processed Thin Films for Fabrication of Transparent MXene Microsupercapacitors. *Small* **14**, 1802864 (2018).
5. S. J. Kim, J. Choi, K. Maleski, K. Hantanasirisakul, H.T. Jung, Y. Gogotsi, C. W. Ahn, Interfacial Assembly of Ultrathin, Functional MXene Films. *ACS Appl. Mater. Interfaces* **11**, 32320–32327 (2019).
6. K. Hantanasirisakul, M. Q. Zhao, P. Urbankowski, J. Halim, B. Anasori, S. Kota, C. E. Ren, M. W. Barsoum, Y. Gogotsi, Fabrication of Ti<sub>3</sub>C<sub>2</sub>T<sub>x</sub> MXene Transparent Thin Films with Tunable Optoelectronic Properties. *Adv. Electron. Mater.* **2**, 1600050 (2016).
7. M. Mariano, O. Mashtalir, F. Q. Antonio, W. H. Ryu, B. Deng, F. Xia, Y. Gogotsi, A. D. Taylor, Solution-processed Titanium Carbide MXene Films Examined as Highly Transparent Conductors. *Nanoscale* **8**, 16371–16378 (2016).
8. H. A. Becerril, J. Mao, Z. Liu, R. M. Stoltenberg, Z. Bao, Y. Chen, Evaluation of Solution-Processed Reduced Graphene Oxide Films as Transparent Conductors. *ACS Nano* **2**, 463–470 (2008).
9. J. Wu, H. A. Becerril, Z. Bao, Z. Liu, Y. Chen, P. Peumans, Organic Solar Cells With Solution-Processed Graphene Transparent Electrodes. *Appl. Phys. Lett.* **92**, 263302 (2008).

10. J. Z. Chen, W.-Y. Ko, Y. C. Yen, P. H. Chen, K. J. Lin, Hydrothermally Processed TiO<sub>2</sub> Nanowire Electrodes with Antireflective and Electrochromic Properties. *ACS Nano* **6**, 6633–6639 (2012).
11. N. N. Dinh, N. Th. T. Oanh, P. D. Long, M. C. Bernard, A. Hugot-Le Goff, Electrochromic Properties of TiO<sub>2</sub> Anatase Thin Films Prepared by A Dipping Sol–Gel Method. *Thin Solid Films* **423**, 70–76 (2003).
12. Z. Tebby, O. Babot, T. Toupance, D. H. Park, G. Campet, M. H. Delville, Low-Temperature UV-Processing of Nanocrystalline Nanoporous Thin TiO<sub>2</sub> Films: An Original Route toward Plastic Electrochromic Systems. *Chem. Mater.* **20**, 7260–7267 (2008).
13. Y. Chen, X. Li, Z. Bi, X. He, G. Li, X. Xu, X. Gao, Design and Construction of Hierarchical TiO<sub>2</sub> Nanorod Arrays by Combining Layer-by-layer and Hydrothermal Crystallization Techniques for Electrochromic Application. *Appl. Surf. Sci.* **440**, 217–223 (2018).
14. R. A. Patil, R. S. Devan, Y. Liou, Y. R. Ma, Efficient Electrochromic Smart Windows of One-Dimensional Pure Brookite TiO<sub>2</sub> Nanoneedles. *Sol. Energy Mater. Sol. Cells* **147**, 240–245 (2016).
15. Y. Chen, X. Li, Z. Bi, X. He, X. Xu, X. Gao, Core-Shell Nanorod Arrays of Crystalline/Amorphous TiO<sub>2</sub> Constructed by Layer-by-Layer Method for High-Performance Electrochromic Electrodes. *Electrochim. Acta.* **251**, 546–553 (2017).
16. S. Cao, S. Zhang, T. Zhang, J. Y. Lee, Fluoride-Assisted Synthesis of Plasmonic Colloidal Ta-Doped TiO<sub>2</sub> Nanocrystals for Near-Infrared and Visible-Light Selective Electrochromic Modulation. *Chem. Mater.* **30**, 4838–4846 (2018)
17. Y. Alesanco, J. Palenzuela, R. Tena-Zaera, G. Cabañero, H. Grande, B. Herbig, A. Schmitt, M. Schott, U. Posset, A. Guerfi, M. Dontigny, K. Zaghbi, A. Viñuales, Plastic Electrochromic Devices Based On Viologen-modified TiO<sub>2</sub> Films Prepared at Low Temperature. *Sol. Energy Mater. Sol. Cells* **157**, 624–635 (2016).
18. R. Li, K. Li, G. Wang, L. Li, Q. Zhang, J. Yan, Y. Chen, Q. Zhang, C. Hou, Y. Li, H. Wang, Ion-Transport Design for High-Performance Na<sup>+</sup>-Based Electrochromics. *ACS Nano* **12**, 3759–3768 (2018).
19. A. Azam, J. Kim, J. Park, T. G. Novak, A. P. Tiwari, S. H. Song, B. Kim, S. Jeon, Two-Dimensional WO<sub>3</sub> Nanosheets Chemically Converted from Layered WS<sub>2</sub> for High-Performance Electrochromic Devices. *Nano Lett.* **18**, 5646–5651 (2018).
20. J. L. Wang, Y. R. Lu, H. H. Li, J. W. Liu, S. H. Yu, Large Area Co-Assembly of Nanowires for Flexible Transparent Smart Windows. *J. Am. Chem. Soc.* **139**, 9921–9926 (2017).
21. Q. Zhang, C. Y. Tsai, L. J. Li, D. J. Liaw, Colorless-to-Colorful Switching Electrochromic Polyimides with Very High Contrast Ratio. *Nat. Commun.* **10**, 1239 (2019).
22. E. Hwang, S. Seo, S. Bak, H. Lee, M. Min, H. Lee, An Electrolyte-Free Flexible Electrochromic Device Using Electrostatically Strong Graphene Quantum Dot-Viologen Nanocomposites. *Adv. Mater.* **26**, 5129–5136 (2014).
23. R. Singh, J. Tharion, S. Murugan, A. Kumar, ITO-Free Solution-Processed Flexible Electrochromic Devices Based on PEDOT:PSS as Transparent Conducting Electrode. *ACS Appl. Mater. Inter.* **9**, 19427–19435 (2016).
24. J. Jensen, M. Hösel, , I. Kim, J. Yu, J. Jo, C. Krebs, Fast Switching ITO Free Electrochromic Devices.

- Adv. Funct. Mater.* **24**, 1228–1233 (2014).
25. S. Macher, M. Schott, M. Sassi, I. Facchinetti, R. Ruffo, G. Patriarca, L. Beverina, U. Posset, A. Giffin, P. Löbmann, New Roll-to-Roll Processable PEDOT-Based Polymer with Colorless Bleached State for Flexible Electrochromic Devices. *Adv. Funct. Mater.* **30**, 1906254 (2019).
  26. L. Zhao, L. Zhao, Y. Xu, T. Qiu, L. Zhi, G. Shi, Polyaniline Electrochromic Devices With Transparent Graphene Electrodes. *Electrochim Acta.* **55**, 491–497 (2009).
  27. S. Zhang, G. Sun, Y. He, R. Fu, Y. Gu, S. Chen, Preparation, Characterization, and Electrochromic Properties of Nanocellulose-based Polyaniline Nanocomposite Films. *ACS Appl. Mater. Inter.* **9**, 16426–16434 (2017).
  28. T. Soganci, S. Soyleyici, H. C. Soyleyici, M. Ak. High Contrast Electrochromic Polymer and Copolymer Materials Based on Amide-substituted Poly(dithienyl pyrrole). *J. Electrochem. Soc.* **164**, H11 (2016).
